# Supplementary material for: Insights on the kinetics and mechanisms of the peroxyl radical scavenging capacity of caftaric acid: the important role of the acid–base equilibrium
Source: Royal Society of Chemistry journal article supplement (doi:10.1039/d2nj00377e), 2022-01-01
Supplement: d2nj00377e1.pdf [file d2nj00377e1.pdf]

## Supporting Information (SI)

---

### Insights on the kinetics and mechanisms of the peroxy radical scavenging capacity of Caftaric acid: the important role of the acid-base equilibrium

Housseem Boulebd<sup>1,\*</sup>, Adam mechler,<sup>2</sup> Nguyen Thi Hoa<sup>3</sup> and Quan V. Vo<sup>3\*</sup>

<sup>1</sup>Department of Chemistry, Faculty of Exact Sciences, University of Frères Mentouri Constantine 1, Constantine, Algeria.

<sup>2</sup>*Department of Chemistry and Physics, La Trobe University, Victoria 3086, Australia.*

<sup>3</sup>The University of Danang - University of Technology and Education, Danang 550000, Vietnam.

\*Corresponding authors: [boulebd.housseem@umc.edu.dz](mailto:boulebd.housseem@umc.edu.dz); [vvquan@ute.udn.vn](mailto:vvquan@ute.udn.vn);

### Table of Contents

|                                                                                                                                                                       |     |
|-----------------------------------------------------------------------------------------------------------------------------------------------------------------------|-----|
| Table S1: The Cartesian coordinates and energies of TS of the reaction between compound CA with HOO <sup>•</sup> following the FHT mechanism in studied solvents..... | S2  |
| Table S2. The method to calculate rate constant following the conventional transition state theory ....                                                               | S10 |
| References .....                                                                                                                                                      | S12 |

**Table S1: The Cartesian coordinates and energies of TS of the reaction between compound CA with HOO<sup>\*</sup> following the FHT mechanism in studied solvents**

| Name                  |             |             |             | TS-CA-O6-H-OOH-FHT-G                         |                             |
|-----------------------|-------------|-------------|-------------|----------------------------------------------|-----------------------------|
| Cartesian Coordinates |             |             |             | Frequency and Energy                         |                             |
| C                     | -3.35949000 | -2.01131000 | -0.54602700 | Zero-point correction=                       | 0.263013 (Hartree/Particle) |
| C                     | -2.43323100 | -1.00553600 | -0.18852900 | Thermal correction to Energy=                | 0.286839                    |
| C                     | -2.88998600 | 0.11863300  | 0.48757600  | Thermal correction to Enthalpy=              | 0.287783                    |
| C                     | -4.24212600 | 0.24117400  | 0.82727000  | Thermal correction to Gibbs Free Energy=     | 0.203251                    |
| C                     | -5.15181600 | -0.79253200 | 0.45415100  | Sum of electronic and zero-point Energies=   | -1330.167969                |
| C                     | -4.70293100 | -1.91390600 | -0.23651700 | Sum of electronic and thermal Energies=      | -1330.144143                |
| O                     | -4.73626200 | 1.27214800  | 1.47937400  | Sum of electronic and thermal Enthalpies=    | -1330.143198                |
| O                     | -6.44645300 | -0.64439200 | 0.74886500  | Sum of electronic and thermal Free Energies= | -1330.227731                |
| C                     | -1.03267600 | -1.19529500 | -0.55570800 |                                              |                             |
| C                     | -0.00946100 | -0.37186900 | -0.29216700 |                                              |                             |
| C                     | 1.33474500  | -0.74436100 | -0.75220500 |                                              |                             |
| O                     | 2.25834200  | 0.21279000  | -0.37952200 |                                              |                             |
| O                     | 1.65287400  | -1.72320200 | -1.36135800 |                                              |                             |
| O                     | 5.50241100  | 1.40510100  | -0.93143800 |                                              |                             |
| C                     | 3.62046200  | -0.02936500 | -0.76006300 |                                              |                             |
| C                     | 4.35045000  | -0.88797000 | 0.29800600  |                                              |                             |
| O                     | 5.50552900  | -1.44448000 | -0.22567400 |                                              |                             |
| C                     | 4.31251500  | 1.31681500  | -0.97129800 |                                              |                             |
| O                     | 3.52120100  | 2.36171500  | -1.22288900 |                                              |                             |
| O                     | 5.73015600  | -0.02136700 | 2.05533900  |                                              |                             |
| C                     | 4.64380600  | -0.08517000 | 1.57445400  |                                              |                             |
| O                     | 3.59013700  | 0.55319800  | 2.11712700  |                                              |                             |
| H                     | -3.00027400 | -2.88516700 | -1.07812900 |                                              |                             |
| H                     | -2.23101000 | 0.92748500  | 0.77864800  |                                              |                             |
| H                     | -5.40955500 | -2.68671000 | -0.51035600 |                                              |                             |
| H                     | -5.19046900 | 1.99397500  | 0.72088400  |                                              |                             |
| H                     | -6.53542000 | 0.13866600  | 1.31544500  |                                              |                             |
| H                     | -0.79786800 | -2.10583800 | -1.10273900 |                                              |                             |
| H                     | -0.11174400 | 0.56136400  | 0.24685200  |                                              |                             |
| H                     | 3.64796200  | -0.58786700 | -1.69848500 |                                              |                             |
| H                     | 3.66985500  | -1.70779100 | 0.55570000  |                                              |                             |
| H                     | 6.22581100  | -0.81253100 | -0.09605800 |                                              |                             |
| H                     | 2.59642900  | 2.10082900  | -1.12713000 |                                              |                             |
| H                     | 2.79646900  | 0.43669100  | 1.57912900  |                                              |                             |
| H                     | -6.11358300 | 1.04121600  | -1.48168400 |                                              |                             |
| O                     | -5.76679700 | 2.42066800  | -0.28748200 |                                              |                             |
| O                     | -5.33465700 | 1.57655100  | -1.25931000 |                                              |                             |
| Name                  |             |             |             | TS-CA-O7-H-OOH-FHT-G                         |                             |
| Cartesian Coordinates |             |             |             | Frequency and Energy                         |                             |
| C                     | 3.31551200  | 1.90162600  | -0.38172800 | Zero-point correction=                       | 0.262955 (Hartree/Particle) |
| C                     | 2.37495000  | 0.88470800  | -0.10680200 | Thermal correction to Energy=                | 0.286756                    |
| C                     | 2.79260500  | -0.29918300 | 0.50843600  | Thermal correction to Enthalpy=              | 0.287700                    |
| C                     | 4.12282500  | -0.45757100 | 0.85139500  | Thermal correction to Gibbs Free Energy=     | 0.204376                    |
| C                     | 5.07552400  | 0.56990100  | 0.57904900  | Sum of electronic and zero-point Energies=   | -1330.167961                |
| C                     | 4.64364100  | 1.74736100  | -0.05585000 | Sum of electronic and thermal Energies=      | -1330.144160                |
| O                     | 4.54920100  | -1.60202300 | 1.41045500  | Sum of electronic and thermal Enthalpies=    | -1330.143216                |
| O                     | 6.31829000  | 0.36252300  | 0.94733200  | Sum of electronic and thermal Free Energies= | -1330.226541                |
| C                     | 0.98514800  | 1.12118600  | -0.48202900 |                                              |                             |
| C                     | -0.05686100 | 0.30526900  | -0.26920500 |                                              |                             |
| C                     | -1.39111600 | 0.72492200  | -0.72258300 |                                              |                             |

|                              |             |             |             |                                                           |
|------------------------------|-------------|-------------|-------------|-----------------------------------------------------------|
| O                            | -2.33556600 | -0.22783500 | -0.39808500 |                                                           |
| O                            | -1.68206600 | 1.73580100  | -1.29066200 |                                                           |
| O                            | -5.59855300 | -1.33120400 | -1.01817400 |                                                           |
| C                            | -3.69034800 | 0.05761700  | -0.77743100 |                                                           |
| C                            | -4.41249800 | 0.88615100  | 0.30979500  |                                                           |
| O                            | -5.55182300 | 1.48534700  | -0.20064800 |                                                           |
| C                            | -4.40715500 | -1.26469500 | -1.04872800 |                                                           |
| O                            | -3.63467500 | -2.31348800 | -1.34054100 |                                                           |
| O                            | -5.82348300 | -0.02515200 | 2.01930000  |                                                           |
| C                            | -4.73230900 | 0.03751300  | 1.54993500  |                                                           |
| O                            | -3.69534900 | -0.64309900 | 2.07402300  |                                                           |
| H                            | 2.97760300  | 2.81329600  | -0.86025600 |                                                           |
| H                            | 2.10476200  | -1.10463900 | 0.73310700  |                                                           |
| H                            | 5.37905800  | 2.51464400  | -0.26212500 |                                                           |
| H                            | 5.46748400  | -1.47577200 | 1.69450800  |                                                           |
| H                            | 6.81087600  | -0.33623800 | 0.20066200  |                                                           |
| H                            | 0.77605500  | 2.06293100  | -0.98424300 |                                                           |
| H                            | 0.02150600  | -0.65345900 | 0.22740800  |                                                           |
| H                            | -3.69900000 | 0.65495400  | -1.69203700 |                                                           |
| H                            | -3.71918200 | 1.68178900  | 0.60644800  |                                                           |
| H                            | -6.28411100 | 0.86056400  | -0.10852600 |                                                           |
| H                            | -2.70584500 | -2.07460300 | -1.22934600 |                                                           |
| H                            | -2.89481000 | -0.51861300 | 1.54847200  |                                                           |
| H                            | 5.31749400  | -1.95191600 | -1.11169900 |                                                           |
| O                            | 6.96633900  | -1.24268000 | -0.64025500 |                                                           |
| O                            | 5.82876200  | -1.16841100 | -1.37373100 |                                                           |
| <b>Name</b>                  |             |             |             | <b>TS-CA-C2-OOH-RAF-G</b>                                 |
| <b>Cartesian Coordinates</b> |             |             |             | <b>Frequency and Energy</b>                               |
| C                            | 2.83249000  | 0.28373300  | 0.01817300  | Zero-point correction= 0.269146 (Hartree/Particle)        |
| C                            | 3.94405200  | 1.01329500  | 0.48834800  | Thermal correction to Energy= 0.292116                    |
| C                            | 5.22242700  | 0.64479600  | 0.13564400  | Thermal correction to Enthalpy= 0.293060                  |
| C                            | 5.43828800  | -0.47085400 | -0.68933500 | Thermal correction to Gibbs Free Energy= 0.214073         |
| C                            | 4.35113500  | -1.20934400 | -1.14399500 | Sum of electronic and zero-point Energies= -1330.178198   |
| C                            | 3.06420900  | -0.84034000 | -0.79483400 | Sum of electronic and thermal Energies= -1330.155229      |
| C                            | 1.51343200  | 0.70328100  | 0.39430400  | Sum of electronic and thermal Enthalpies= -1330.154284    |
| C                            | 0.34114400  | 0.16872600  | -0.11563800 | Sum of electronic and thermal Free Energies= -1330.233271 |
| O                            | 6.69007200  | -0.83384800 | -1.03003000 |                                                           |
| O                            | 6.36261600  | 1.29015200  | 0.52943300  |                                                           |
| H                            | 3.78682200  | 1.87732600  | 1.12712600  |                                                           |
| H                            | 4.54318700  | -2.07945500 | -1.75896500 |                                                           |
| H                            | 2.23044800  | -1.44992400 | -1.11920400 |                                                           |
| H                            | 1.41776200  | 1.45084400  | 1.17521700  |                                                           |
| H                            | 7.31491400  | -0.22801900 | -0.61257600 |                                                           |
| O                            | 0.04644700  | -1.50707200 | 0.70865400  |                                                           |
| H                            | 6.15918500  | 2.00562600  | 1.13728600  |                                                           |
| C                            | -0.91891800 | 0.82873700  | 0.27417400  |                                                           |
| O                            | -1.97574800 | 0.33509200  | -0.40069200 |                                                           |
| O                            | -1.04318700 | 1.69316000  | 1.11226800  |                                                           |
| C                            | -3.26891400 | 0.61104900  | 0.14088700  |                                                           |
| C                            | -4.15385000 | -0.58239100 | -0.18293700 |                                                           |
| C                            | -3.83288200 | 1.91442700  | -0.43595800 |                                                           |
| H                            | -3.19046400 | 0.70268800  | 1.22814300  |                                                           |
| O                            | -4.38213800 | -0.77230400 | -1.55344800 |                                                           |
| C                            | -3.45778500 | -1.83075100 | 0.36495800  |                                                           |

|                       |             |             |             |                                                           |
|-----------------------|-------------|-------------|-------------|-----------------------------------------------------------|
| H                     | -5.09556300 | -0.46657400 | 0.36821900  |                                                           |
| O                     | -4.82493400 | 1.93341000  | -1.11425200 |                                                           |
| O                     | -3.16294300 | 3.01261000  | -0.12575800 |                                                           |
| H                     | -4.84537500 | 0.00631700  | -1.89119100 |                                                           |
| O                     | -3.00272400 | -1.84805200 | 1.47847100  |                                                           |
| O                     | -3.41055800 | -2.86314700 | -0.45240200 |                                                           |
| H                     | -3.78388600 | -2.59515200 | -1.30865800 |                                                           |
| H                     | -2.40804300 | 2.80257000  | 0.45685500  |                                                           |
| H                     | 0.32039700  | -0.33892800 | -1.07191900 |                                                           |
| O                     | -0.25667600 | -1.38557300 | 2.03384400  |                                                           |
| H                     | -1.22018900 | -1.52892700 | 2.05823000  |                                                           |
| <b>Name</b>           |             |             |             | <b>TS-CA-O6-H-OOH-FHT-P</b>                               |
| Cartesian Coordinates |             |             |             | Frequency and Energy                                      |
| C                     | -3.43759200 | -1.98485900 | -0.86366200 | Zero-point correction= 0.262854 (Hartree/Particle)        |
| C                     | -2.49257600 | -1.07865400 | -0.33017700 | Thermal correction to Energy= 0.286524                    |
| C                     | -2.93061600 | -0.08013800 | 0.53015600  | Thermal correction to Enthalpy= 0.287468                  |
| C                     | -4.28849600 | 0.02518900  | 0.85583300  | Thermal correction to Gibbs Free Energy= 0.205364         |
| C                     | -5.21936800 | -0.90172300 | 0.30177100  | Sum of electronic and zero-point Energies= -1330.209110   |
| C                     | -4.78343700 | -1.90452500 | -0.55868700 | Sum of electronic and thermal Energies= -1330.185441      |
| O                     | -4.77028200 | 0.94139700  | 1.67676800  | Sum of electronic and thermal Enthalpies= -1330.184496    |
| O                     | -6.50996500 | -0.79013300 | 0.61900300  | Sum of electronic and thermal Free Energies= -1330.266601 |
| C                     | -1.09353000 | -1.23642100 | -0.71529700 |                                                           |
| C                     | -0.07249400 | -0.43882300 | -0.37028800 |                                                           |
| C                     | 1.27179200  | -0.75721500 | -0.85483800 |                                                           |
| O                     | 2.18612200  | 0.17044600  | -0.38136800 |                                                           |
| O                     | 1.61276500  | -1.66561100 | -1.55684300 |                                                           |
| O                     | 5.39074900  | 1.48305400  | -0.87104400 |                                                           |
| C                     | 3.55077300  | -0.01376900 | -0.75818800 |                                                           |
| C                     | 4.30287700  | -0.87425800 | 0.28375100  |                                                           |
| O                     | 5.49484600  | -1.36265900 | -0.22985900 |                                                           |
| C                     | 4.19885700  | 1.35832900  | -0.91559300 |                                                           |
| O                     | 3.38839800  | 2.39095000  | -1.11707400 |                                                           |
| O                     | 5.60249400  | -0.00589700 | 2.10909700  |                                                           |
| C                     | 4.53167300  | -0.10063100 | 1.59030900  |                                                           |
| O                     | 3.44845700  | 0.48324400  | 2.12484600  |                                                           |
| H                     | -3.09056300 | -2.76480600 | -1.53279300 |                                                           |
| H                     | -2.25019200 | 0.63961900  | 0.97084200  |                                                           |
| H                     | -5.50036100 | -2.60372900 | -0.97062700 |                                                           |
| H                     | -4.84141500 | 1.91168400  | 1.12983500  |                                                           |
| H                     | -6.59853100 | -0.07767100 | 1.27316500  |                                                           |
| H                     | -0.87190800 | -2.09061400 | -1.35116000 |                                                           |
| H                     | -0.18165700 | 0.44156000  | 0.25071900  |                                                           |
| H                     | 3.61056200  | -0.53142800 | -1.71853100 |                                                           |
| H                     | 3.66109300  | -1.73288100 | 0.50992400  |                                                           |
| H                     | 6.14476900  | -0.64678500 | -0.20752600 |                                                           |
| H                     | 2.46318700  | 2.11031000  | -1.05454900 |                                                           |
| H                     | 2.65846300  | 0.33256900  | 1.58527400  |                                                           |
| H                     | -5.52956400 | 1.90146500  | -1.34441700 |                                                           |
| O                     | -5.01275900 | 2.77439100  | 0.21814900  |                                                           |
| O                     | -4.68140200 | 2.08695500  | -0.90438300 |                                                           |
| <b>Name</b>           |             |             |             | <b>TS-CA-O7-H-OOH-FHT-P</b>                               |
| Cartesian Coordinates |             |             |             | Frequency and Energy                                      |
| C                     | -3.33835300 | -1.55120500 | 0.82725000  | Zero-point correction= 0.262600 (Hartree/Particle)        |
| C                     | -2.35980600 | -0.61423300 | 0.42877600  | Thermal correction to Energy= 0.286434                    |

|                       |             |             |             |                                              |                             |
|-----------------------|-------------|-------------|-------------|----------------------------------------------|-----------------------------|
| C                     | -2.72091200 | 0.71691300  | 0.19267100  | Thermal correction to Enthalpy=              | 0.287379                    |
| C                     | -4.03852200 | 1.10548300  | 0.35070800  | Thermal correction to Gibbs Free Energy=     | 0.204836                    |
| C                     | -5.02812700 | 0.16151000  | 0.75195200  | Sum of electronic and zero-point Energies=   | -1330.209055                |
| C                     | -4.65171500 | -1.17285200 | 0.98802000  | Sum of electronic and thermal Energies=      | -1330.185220                |
| O                     | -4.40512800 | 2.37452500  | 0.12505400  | Sum of electronic and thermal Enthalpies=    | -1330.184276                |
| O                     | -6.25934900 | 0.60957100  | 0.90323400  | Sum of electronic and thermal Free Energies= | -1330.266818                |
| C                     | -0.98689700 | -1.08763500 | 0.28007200  |                                              |                             |
| C                     | 0.08046400  | -0.34506300 | -0.04822600 |                                              |                             |
| C                     | 1.39336500  | -0.99042300 | -0.15348100 |                                              |                             |
| O                     | 2.36901200  | -0.05266100 | -0.44057700 |                                              |                             |
| O                     | 1.66038400  | -2.14967200 | -0.01899500 |                                              |                             |
| O                     | 5.63340900  | 0.41381500  | -1.59488700 |                                              |                             |
| C                     | 3.70607600  | -0.53596000 | -0.58359700 |                                              |                             |
| C                     | 4.43306900  | -0.57866300 | 0.78030400  |                                              |                             |
| O                     | 5.56909100  | -1.37170600 | 0.72129500  |                                              |                             |
| C                     | 4.43586500  | 0.36188000  | -1.57814600 |                                              |                             |
| O                     | 3.68735400  | 1.05928300  | -2.42560700 |                                              |                             |
| O                     | 5.85471100  | 1.15379100  | 1.64507900  |                                              |                             |
| C                     | 4.76174500  | 0.83177600  | 1.28960600  |                                              |                             |
| O                     | 3.74182700  | 1.70321600  | 1.30928100  |                                              |                             |
| H                     | -3.04224300 | -2.57838300 | 1.00514100  |                                              |                             |
| H                     | -1.99553100 | 1.46010000  | -0.11499300 |                                              |                             |
| H                     | -5.41535900 | -1.88015700 | 1.28969500  |                                              |                             |
| H                     | -5.34669400 | 2.45749800  | 0.34404000  |                                              |                             |
| H                     | -6.88411400 | 0.25208800  | 0.06071600  |                                              |                             |
| H                     | -0.82942300 | -2.14864700 | 0.45958800  |                                              |                             |
| H                     | 0.03404200  | 0.71971400  | -0.23944000 |                                              |                             |
| H                     | 3.69835000  | -1.55256200 | -0.98471200 |                                              |                             |
| H                     | 3.74096700  | -1.04034400 | 1.49308900  |                                              |                             |
| H                     | 6.27439900  | -0.85334500 | 0.31007200  |                                              |                             |
| H                     | 2.74780500  | 0.94203900  | -2.22111100 |                                              |                             |
| H                     | 2.92403500  | 1.30521500  | 0.97737200  |                                              |                             |
| H                     | -5.85241700 | 0.14785700  | -2.30326400 |                                              |                             |
| O                     | -7.26560300 | -0.08120200 | -1.11338700 |                                              |                             |
| O                     | -6.11900300 | -0.54208600 | -1.67047200 |                                              |                             |
| <b>Name</b>           |             |             |             | <b>TS-CA-C2-OOH-RAF-FHT-P</b>                |                             |
| Cartesian Coordinates |             |             |             | Frequency and Energy                         |                             |
| C                     | 2.85782100  | 0.23624600  | 0.00028500  | Zero-point correction=                       | 0.268487 (Hartree/Particle) |
| C                     | 3.96662400  | 0.85677800  | 0.61498800  | Thermal correction to Energy=                | 0.291433                    |
| C                     | 5.24957200  | 0.53618900  | 0.23200000  | Thermal correction to Enthalpy=              | 0.292377                    |
| C                     | 5.47026100  | -0.41529100 | -0.77786700 | Thermal correction to Gibbs Free Energy=     | 0.214072                    |
| C                     | 4.38574400  | -1.03560500 | -1.39103800 | Sum of electronic and zero-point Energies=   | -1330.214062                |
| C                     | 3.09513500  | -0.71703200 | -1.00841900 | Sum of electronic and thermal Energies=      | -1330.191115                |
| C                     | 1.54217300  | 0.61058500  | 0.43164500  | Sum of electronic and thermal Enthalpies=    | -1330.190171                |
| C                     | 0.35626500  | 0.08335600  | -0.05373700 | Sum of electronic and thermal Free Energies= | -1330.268476                |
| O                     | 6.72496100  | -0.73031700 | -1.15217600 |                                              |                             |
| O                     | 6.38229100  | 1.07835200  | 0.76155200  |                                              |                             |
| H                     | 3.80609400  | 1.59164000  | 1.39800300  |                                              |                             |
| H                     | 4.57756900  | -1.77021200 | -2.16383300 |                                              |                             |
| H                     | 2.26651900  | -1.21870800 | -1.49242700 |                                              |                             |
| H                     | 1.47172300  | 1.32506600  | 1.24623800  |                                              |                             |
| H                     | 7.35094000  | -0.22033900 | -0.62003700 |                                              |                             |
| O                     | 0.03536400  | -1.55474500 | 0.86643100  |                                              |                             |
| H                     | 6.17000200  | 1.68979400  | 1.47638900  |                                              |                             |

|                       |             |             |             |                                                           |
|-----------------------|-------------|-------------|-------------|-----------------------------------------------------------|
| C                     | -0.89142900 | 0.77298000  | 0.32857800  |                                                           |
| O                     | -1.95317100 | 0.29460800  | -0.34480600 |                                                           |
| O                     | -0.99729600 | 1.65541700  | 1.15160100  |                                                           |
| C                     | -3.25562900 | 0.63375100  | 0.14365700  |                                                           |
| C                     | -4.18279500 | -0.51090300 | -0.23641800 |                                                           |
| C                     | -3.73444400 | 1.96470800  | -0.44812000 |                                                           |
| H                     | -3.22794400 | 0.72494100  | 1.23362900  |                                                           |
| O                     | -4.34619600 | -0.67119500 | -1.62117600 |                                                           |
| C                     | -3.59004200 | -1.80736600 | 0.31417100  |                                                           |
| H                     | -5.14374000 | -0.35766700 | 0.27013400  |                                                           |
| O                     | -4.71704000 | 2.04621400  | -1.13672600 |                                                           |
| O                     | -3.00642000 | 3.02546300  | -0.13965900 |                                                           |
| H                     | -4.83686100 | 0.08907600  | -1.96046000 |                                                           |
| O                     | -3.15347100 | -1.88077900 | 1.43502600  |                                                           |
| O                     | -3.60812400 | -2.83785000 | -0.50671400 |                                                           |
| H                     | -3.95861300 | -2.54654600 | -1.36687900 |                                                           |
| H                     | -2.27821700 | 2.77974300  | 0.46460100  |                                                           |
| H                     | 0.31648000  | -0.44796200 | -0.99611300 |                                                           |
| O                     | -0.45074900 | -1.35076600 | 2.13400500  |                                                           |
| H                     | -1.41068400 | -1.48441600 | 2.03353900  |                                                           |
| <b>Name</b>           |             |             |             | <b>TS-CA-DIANION-O6-H-OOH-FHT-W</b>                       |
| Cartesian Coordinates |             |             |             | Frequency and Energy                                      |
| C                     | -3.39641000 | -2.02823300 | -0.54187600 | Zero-point correction= 0.235181 (Hartree/Particle)        |
| C                     | -2.45402600 | -1.06125000 | -0.11852600 | Thermal correction to Energy= 0.257720                    |
| C                     | -2.90388300 | 0.05568400  | 0.57169900  | Thermal correction to Enthalpy= 0.258664                  |
| C                     | -4.26782500 | 0.21677600  | 0.84381500  | Thermal correction to Gibbs Free Energy= 0.179486         |
| C                     | -5.19761600 | -0.76452300 | 0.39272800  | Sum of electronic and zero-point Energies= -1329.359143   |
| C                     | -4.74837200 | -1.88639300 | -0.29927100 | Sum of electronic and thermal Energies= -1329.336604      |
| O                     | -4.73910900 | 1.25749800  | 1.52534500  | Sum of electronic and thermal Enthalpies= -1329.335660    |
| O                     | -6.50431500 | -0.60488300 | 0.63627400  | Sum of electronic and thermal Free Energies= -1329.414838 |
| C                     | -1.04330600 | -1.28786800 | -0.43475000 |                                                           |
| C                     | -0.03876500 | -0.42478100 | -0.24248200 |                                                           |
| C                     | 1.33282100  | -0.80197500 | -0.62347300 |                                                           |
| O                     | 2.18840200  | 0.20794900  | -0.41093400 |                                                           |
| O                     | 1.67379100  | -1.87565500 | -1.07805300 |                                                           |
| O                     | 5.47982500  | 1.31336100  | -1.08119700 |                                                           |
| C                     | 3.56573800  | -0.01453600 | -0.73347800 |                                                           |
| C                     | 4.25649300  | -0.78878900 | 0.40335100  |                                                           |
| O                     | 5.28234200  | -1.60963200 | -0.11931100 |                                                           |
| C                     | 4.22538200  | 1.33762000  | -1.05966600 |                                                           |
| O                     | 3.49240800  | 2.31745000  | -1.31485500 |                                                           |
| O                     | 5.97861200  | -0.07279400 | 1.88079600  |                                                           |
| C                     | 4.80416700  | 0.14613400  | 1.49771400  |                                                           |
| O                     | 4.02436100  | 1.02880400  | 1.92260500  |                                                           |
| H                     | -3.04062200 | -2.90253400 | -1.07605500 |                                                           |
| H                     | -2.22556300 | 0.82281700  | 0.92760700  |                                                           |
| H                     | -5.46488500 | -2.62734400 | -0.63169200 |                                                           |
| H                     | -5.12330500 | 1.99297100  | 0.80543300  |                                                           |
| H                     | -6.63633200 | 0.20134200  | 1.16119400  |                                                           |
| H                     | -0.81138900 | -2.25256600 | -0.88005700 |                                                           |
| H                     | -0.17311200 | 0.56557400  | 0.17508800  |                                                           |
| H                     | 3.62407300  | -0.62868800 | -1.63578600 |                                                           |
| H                     | 3.49646800  | -1.41997700 | 0.87895200  |                                                           |
| H                     | 6.07197700  | -1.38119900 | 0.39752900  |                                                           |

|                       |             |             |             |                                                           |
|-----------------------|-------------|-------------|-------------|-----------------------------------------------------------|
| O                     | -5.46589300 | 2.59514100  | -0.29944200 |                                                           |
| O                     | -5.19173700 | 1.64690800  | -1.22942300 |                                                           |
| H                     | -4.27317700 | 1.80923100  | -1.51135300 |                                                           |
| <b>Name</b>           |             |             |             | <b>TS-CA-DIANION-O7-H-OOH-FHT-W</b>                       |
| Cartesian Coordinates |             |             |             | Frequency and Energy                                      |
| C                     | 3.28810100  | -1.92781000 | 0.04615800  | Zero-point correction= 0.235167 (Hartree/Particle)        |
| C                     | 2.32399900  | -0.99080700 | -0.38968000 | Thermal correction to Energy= 0.257883                    |
| C                     | 2.73005300  | 0.26787000  | -0.83789000 | Thermal correction to Enthalpy= 0.258827                  |
| C                     | 4.07646800  | 0.59242500  | -0.84612500 | Thermal correction to Gibbs Free Energy= 0.178793         |
| C                     | 5.04851200  | -0.34632800 | -0.39712400 | Sum of electronic and zero-point Energies= -1329.360734   |
| C                     | 4.62686600  | -1.60803000 | 0.05511200  | Sum of electronic and thermal Energies= -1329.338018      |
| O                     | 4.46774100  | 1.80647100  | -1.27748600 | Sum of electronic and thermal Enthalpies= -1329.337074    |
| O                     | 6.33166600  | -0.00086100 | -0.44127100 | Sum of electronic and thermal Free Energies= -1329.417108 |
| C                     | 0.91696500  | -1.38976500 | -0.34864400 |                                                           |
| C                     | -0.13335500 | -0.58993800 | -0.56862400 |                                                           |
| C                     | -1.50227400 | -1.12875000 | -0.46944500 |                                                           |
| O                     | -2.41294900 | -0.15740400 | -0.62376200 |                                                           |
| O                     | -1.79791900 | -2.28962200 | -0.27936700 |                                                           |
| O                     | -5.25843400 | -1.28693900 | 1.22891500  |                                                           |
| C                     | -3.77849700 | -0.52550400 | -0.44268400 |                                                           |
| C                     | -4.63557400 | 0.65956100  | -0.92972200 |                                                           |
| O                     | -5.98968700 | 0.26167700  | -1.00120900 |                                                           |
| C                     | -4.09331700 | -0.85162600 | 1.03313700  |                                                           |
| O                     | -3.21935700 | -0.63332200 | 1.89419400  |                                                           |
| O                     | -3.45105500 | 2.62713900  | -0.28144600 |                                                           |
| C                     | -4.42558200 | 1.88364100  | -0.01038300 |                                                           |
| O                     | -5.22296600 | 2.02156100  | 0.94660100  |                                                           |
| H                     | 2.95842500  | -2.90378700 | 0.38310200  |                                                           |
| H                     | 2.01909200  | 1.00569300  | -1.19005400 |                                                           |
| H                     | 5.37849500  | -2.31127500 | 0.39356900  |                                                           |
| H                     | 6.54312000  | 0.66446900  | 0.39684100  |                                                           |
| H                     | 0.72925800  | -2.43075900 | -0.09739200 |                                                           |
| H                     | -0.04428300 | 0.46511400  | -0.79673100 |                                                           |
| H                     | -4.01293700 | -1.39638300 | -1.05792900 |                                                           |
| H                     | -4.31532200 | 0.91752900  | -1.93998400 |                                                           |
| H                     | -6.20008300 | -0.17058900 | -0.15733400 |                                                           |
| O                     | 6.42526300  | 1.36796900  | 1.50841300  |                                                           |
| O                     | 5.10557700  | 1.23124500  | 1.77809600  |                                                           |
| H                     | 5.43653200  | 1.85476800  | -1.27085700 |                                                           |
| H                     | 5.03047100  | 0.45227400  | 2.35882200  |                                                           |
| <b>Name</b>           |             |             |             | <b>TS-CA-DIANION-C2-OOH-RAF-FHT-W</b>                     |
| Cartesian Coordinates |             |             |             | Frequency and Energy                                      |
| C                     | 2.79177900  | 0.22241800  | 0.11780500  | Zero-point correction= 0.240811 (Hartree/Particle)        |
| C                     | 3.89185000  | 0.44605500  | 0.97146200  | Thermal correction to Energy= 0.263363                    |
| C                     | 5.18161800  | 0.38014000  | 0.48902200  | Thermal correction to Enthalpy= 0.264307                  |
| C                     | 5.40956900  | 0.08360000  | -0.86391200 | Thermal correction to Gibbs Free Energy= 0.186144         |
| C                     | 4.33328200  | -0.14870500 | -1.71553300 | Sum of electronic and zero-point Energies= -1329.364802   |
| C                     | 3.03757300  | -0.08098700 | -1.23510300 | Sum of electronic and thermal Energies= -1329.342250      |
| C                     | 1.46956000  | 0.31980500  | 0.67150500  | Sum of electronic and thermal Enthalpies= -1329.341306    |
| C                     | 0.29229100  | 0.14038900  | -0.03013700 | Sum of electronic and thermal Free Energies= -1329.419469 |
| O                     | 6.67423300  | 0.01693900  | -1.35349600 |                                                           |
| O                     | 6.30218400  | 0.58679900  | 1.24566200  |                                                           |
| H                     | 3.72817500  | 0.67630200  | 2.01963100  |                                                           |
| H                     | 4.53523400  | -0.38103100 | -2.75434500 |                                                           |

|                       |             |             |             |                                                           |
|-----------------------|-------------|-------------|-------------|-----------------------------------------------------------|
| H                     | 2.21431700  | -0.26907300 | -1.91286400 |                                                           |
| H                     | 1.39731500  | 0.50605400  | 1.73873800  |                                                           |
| H                     | 7.30508800  | 0.21529500  | -0.64667600 |                                                           |
| O                     | -0.05817800 | -1.76921800 | -0.07984500 |                                                           |
| H                     | 6.06024300  | 0.79790600  | 2.15683400  |                                                           |
| C                     | -0.98027500 | 0.48862000  | 0.64668300  |                                                           |
| O                     | -1.99027900 | 0.55434400  | -0.22630100 |                                                           |
| O                     | -1.09909900 | 0.65470400  | 1.84030700  |                                                           |
| C                     | -3.32573200 | 0.71384300  | 0.27786500  |                                                           |
| C                     | -4.16633200 | -0.45478200 | -0.23038100 |                                                           |
| C                     | -3.86754100 | 2.09635100  | -0.13721900 |                                                           |
| H                     | -3.30435600 | 0.68705700  | 1.36784300  |                                                           |
| O                     | -4.50554000 | -0.31644300 | -1.59715900 |                                                           |
| C                     | -3.39556700 | -1.76707500 | -0.00629300 |                                                           |
| H                     | -5.07164400 | -0.50215400 | 0.38468600  |                                                           |
| O                     | -5.11092100 | 2.17107900  | -0.29976700 |                                                           |
| O                     | -3.04001400 | 3.02532700  | -0.23879000 |                                                           |
| H                     | -5.05300400 | 0.47902500  | -1.65658600 |                                                           |
| O                     | -2.93354400 | -1.91448700 | 1.16470600  |                                                           |
| O                     | -3.27847000 | -2.57238900 | -0.94471500 |                                                           |
| H                     | 0.27164400  | 0.16647900  | -1.11231800 |                                                           |
| O                     | -0.31200700 | -2.28604500 | 1.16798100  |                                                           |
| H                     | -1.30239100 | -2.21876600 | 1.25182400  |                                                           |
| <b>Name</b>           |             |             |             | <b>TS-CA-TRIANION-O6-H-OOH-FHT-W</b>                      |
| Cartesian Coordinates |             |             |             | Frequency and Energy                                      |
| C                     | 3.15854300  | -2.03241300 | -0.61841700 | Zero-point correction= 0.223468 (Hartree/Particle)        |
| C                     | 2.26765500  | -0.96558000 | -0.33755200 | Thermal correction to Energy= 0.243679                    |
| C                     | 2.81538100  | 0.29690300  | -0.12460100 | Thermal correction to Enthalpy= 0.244624                  |
| C                     | 4.19725300  | 0.54191600  | -0.20264700 | Thermal correction to Gibbs Free Energy= 0.169409         |
| C                     | 5.10906200  | -0.55460600 | -0.50608100 | Sum of electronic and zero-point Energies= -1328.920258   |
| C                     | 4.51641800  | -1.83651000 | -0.69570000 | Sum of electronic and thermal Energies= -1328.900047      |
| O                     | 4.64290700  | 1.77247400  | -0.06614900 | Sum of electronic and thermal Enthalpies= -1328.899103    |
| O                     | 6.37227700  | -0.37123200 | -0.61633300 | Sum of electronic and thermal Free Energies= -1328.974318 |
| C                     | 0.83531200  | -1.27375100 | -0.31114500 |                                                           |
| C                     | -0.22036400 | -0.46491500 | -0.15327300 |                                                           |
| C                     | -1.59701400 | -1.05267200 | -0.20907300 |                                                           |
| O                     | -2.52115700 | -0.11402300 | -0.13488700 |                                                           |
| O                     | -1.79952800 | -2.24072300 | -0.35906200 |                                                           |
| O                     | -5.61369500 | -1.00587800 | 1.47040300  |                                                           |
| C                     | -3.90333300 | -0.51591700 | -0.09407600 |                                                           |
| C                     | -4.72491000 | 0.47662100  | -0.94597800 |                                                           |
| O                     | -6.06521400 | 0.00751600  | -0.97622400 |                                                           |
| C                     | -4.37858400 | -0.77121100 | 1.37947900  |                                                           |
| O                     | -3.51213900 | -0.81406600 | 2.25956100  |                                                           |
| O                     | -5.26913700 | 2.33044000  | 0.47642100  |                                                           |
| C                     | -4.62909700 | 1.98735000  | -0.53478800 |                                                           |
| O                     | -3.93986300 | 2.69914800  | -1.30665100 |                                                           |
| H                     | 2.74232200  | -3.02268300 | -0.77918100 |                                                           |
| H                     | 2.17733200  | 1.14626800  | 0.09446200  |                                                           |
| H                     | 5.19380700  | -2.65467700 | -0.91843000 |                                                           |
| H                     | 5.67029600  | 1.89803100  | 0.29246100  |                                                           |
| H                     | 0.58939500  | -2.32446000 | -0.45570100 |                                                           |
| H                     | -0.15289900 | 0.60656000  | -0.00514900 |                                                           |
| H                     | -3.98422800 | -1.48946800 | -0.58506900 |                                                           |



|   |             |             |             |
|---|-------------|-------------|-------------|
| H | -4.33873200 | 0.41537700  | -1.96865300 |
| H | -6.24874600 | -0.24960800 | -0.04882400 |
| H | 6.93332500  | 0.28451200  | 0.59762600  |
| O | 6.83151600  | 2.12922600  | 0.87871000  |
| O | 7.21655900  | 0.90447500  | 1.36165900  |

**Table S2. The method to calculate rate constant following the conventional transition state theory**

The rate constant ( $k$ ) was calculated by using the conventional transition state theory (TST) (at 298.15 K, 1M standard state) according to the equation (1):[1-5]

$$k = \sigma \kappa \frac{k_B T}{h} e^{-(\Delta G^\ddagger)/RT} \quad (1)$$

Where:  $\sigma$  is the reaction symmetry number ,[6,7]

$\kappa$  contains the tunneling corrections calculated using the Eckart barrier,[8]

$k_B$  is the Boltzmann constant,

$h$  is the Planck constant,

$\Delta G^\ddagger$  is the Gibbs free energy of activation.

The Marcus Theory was used to estimate the reaction barriers of SET reactions.[9-12] The free energy of reaction  $\Delta G^\ddagger$  for the SET pathway was computed following the equations (2,3).

$$\Delta G_{SET}^\ddagger = \frac{\lambda}{4} \left( 1 + \frac{\Delta G_{SET}^0}{\lambda} \right)^2 \quad (2)$$

$$\lambda \approx \Delta E_{SET} - \Delta G_{SET}^0 \quad (3)$$

where  $\Delta G_{SET}$  is the Gibbs energy of reaction,  $\Delta E_{SET}$  is the non-adiabatic energy difference between reactants and vertical products for SET.[13,14]

For rate constants that were close to the diffusion limit a correction was applied to yield realistic results[15]. The apparent rate constants ( $k_{app}$ ) were calculated following the Collins–Kimball theory in the solvents at 298.15K;[16] the steady-state Smoluchowski rate constant ( $k_D$ ) for an irreversible bimolecular diffusion–controlled reaction was calculated following the literature as corrodng to equations (4,5).[15,17]

$$k_{app} = \frac{k_{TST} k_D}{k_{TST} + k_D} \quad (4)$$

$$k_D = 4\pi R_{AB} D_{AB} N_A \quad (5)$$

where  $R_{AB}$  is the reaction distance,  $N_A$  is the Avogadro constant, and  $D_{AB} = D_A + D_B$  ( $D_{AB}$  is the mutual diffusion coefficient of the reactants A and B), [16,18] where  $D_A$  or  $D_B$  is estimated using the Stokes–Einstein formulation (6). [19,20]

$$D_{A \text{ or } B} = \frac{k_B T}{6\pi\eta a_{A \text{ or } B}} \quad (6)$$

$\eta$  is the viscosity of the solvents (i.e.  $\eta(\text{H}_2\text{O}) = 8.91 \times 10^{-4} \text{ Pa s}$ ,  $\eta(\text{pentyl ethanoate}) = 8.62 \times 10^{-4} \text{ Pa s}$ ) and  $a$  is the radius of the solute.

The kinetic study requires different considerations. In this study, the solvent effects of water and pentyl ethanoate were modelled by the solvation model density (SMD) method [21,22]. Water (dielectric constants,  $\epsilon = 78.35$ ) and pentyl ethanoate ( $\epsilon = 4.73$ ) are the *de facto* standard solvents in the literature to mimic the polar and nonpolar environments in the human body [15,23-25]. Thus, these solvents were used to model the physiological environments. The solvent cage effects were included following the corrections proposed by Okuno, [26] adjusted with the free volume theory according to the Benson correction [15,27-29] to reduce over-penalizing entropy losses in solution. For the species that have multiple conformers, all of these were investigated and the conformer with the lowest electronic energy was included in the analysis. [24,25] The hindered internal rotation treatment was also applied to the single bonds to ensure that the obtained conformer has the lowest electronic energy [25,30]. All transition states were characterized by the existence of only one single imaginary frequency. Intrinsic coordinate calculations (IRCs) were performed to ensure that each transition state is connected correctly with the pre-complex and post-complex.

## References

- [1] M.G. Evans, M. Polanyi, *Trans. Faraday Soc.* 31 (1935) 875.
- [2] H. Eyring, *J. Chem. Phys.* 3 (1935) 107.
- [3] D.G. Truhlar, W.L. Hase, J.T. Hynes, *J. Phys. Chem.* 87 (1983) 2664.
- [4] T. Furuncuoglu, I. Ugur, I. Degirmenci, V. Aviyente, *Macromolecules* 43 (2010) 1823.
- [5] E. Vélez, J. Quijano, R. Notario, E. Pabón, J. Murillo, J. Leal, E. Zapata, G. Alarcón, *J. Phys. Org. Chem.* 22 (2009) 971.
- [6] E. Pollak, P. Pechukas, *J. Am. Chem. Soc.* 100 (1978) 2984.
- [7] A. Fernández-Ramos, B.A. Ellingson, R. Meana-Pañeda, J.M. Marques, D.G. Truhlar, *Theor. Chem. Acc.* 118 (2007) 813.
- [8] C. Eckart, *Phy. Rev.* 35 (1930) 1303.
- [9] R.A. Marcus, *Annu. Rev. Phys. Chem.* 15 (1964) 155.
- [10] R.A. Marcus, *Rev. Mod. Phys.* 65 (1993) 599.
- [11] Y. Lu, A. Wang, P. Shi, H. Zhang, *PloS one* 12 (2017) e0169773.
- [12] Y. Lu, A. Wang, P. Shi, H. Zhang, Z. Li, *PloS one* 10 (2015) e0133259.
- [13] S.F. Nelsen, S.C. Blackstock, Y. Kim, *J. Am. Chem. Soc.* 109 (1987) 677.
- [14] S.F. Nelsen, M.N. Weaver, Y. Luo, J.R. Pladziewicz, L.K. Ausman, T.L. Jentzsch, J.J. O'Konek, *J. Phys. Chem. A* 110 (2006) 11665.
- [15] A. Galano, J.R. Alvarez-Idaboy, *J. Comput. Chem.* 34 (2013) 2430.
- [16] F.C. Collins, G.E. Kimball, *J. Colloid Sci.* 4 (1949) 425.
- [17] M. Von Smoluchowski, *Z. Phys. Chem* 92 (1917) 129.
- [18] D.G. Truhlar, *J. Chem. Educ.* 62 (1985) 104.
- [19] A. Einstein, *Ann. Phys.* 17 (1905) 549.
- [20] G.G. Stokes, *Mathematical and Physical Papers*, University Press, Cambridge, 1905.
- [21] A.V. Marenich, C.J. Cramer, D.G. Truhlar, *The Journal of Physical Chemistry B* 113 (2009) 6378.
- [22] C.P. Kelly, C.J. Cramer, D.G. Truhlar, *Journal of chemical theory and computation* 1 (2005) 1133.
- [23] A. Galano, J. Raúl Alvarez-Idaboy, *Int. J. Quantum Chem.* 119 (2019) e25665.
- [24] Q.V. Vo, T.V. Gon, M.V. Bay, A. Mechler, *J. Phys. Chem. B* 123 (2019) 10672.
- [25] Q.V. Vo, A. Mechler, *J. Chem. Inf. Model.* 60 (2020) 316.
- [26] Y. Okuno, *Chem.: Eur. J.* 3 (1997) 212.
- [27] S. Benson, *The foundations of chemical kinetics*: , Malabar, Florida, 1982.
- [28] C. Iuga, J.R. Alvarez-Idaboy, A. Vivier-Bunge, *J. Phys. Chem. B* 115 (2011) 12234.
- [29] J.R. Alvarez-Idaboy, L. Reyes, N. Mora-Diez, *Org. Biomol. Chem.* 5 (2007) 3682.

[30] T.H. Le, T.T. Tran, L.K. Huynh, *Chemom. Intell. Lab. Syst.* 172 (2018) 10.
